# Supplementary material for: Alternating copolymers of functionalized α-methyl styrene monomers and maleic anhydride
Source: Royal Society of Chemistry journal article supplement (doi:10.1039/c5py00935a), 2015-01-01
Supplement: c5py00935a1.pdf [file c5py00935a1.pdf]

## **Electronic Supplementary Information**

### **Perfect Alternation of Functionalized Alpha-Methyl Styrene Monomers and Maleic Anhydride**

Edward L. Malins<sup>a</sup>, C. Waterson<sup>b</sup> and C. Remzi Becer<sup>\*c</sup>

<sup>a</sup> Department of Chemistry, University of Warwick, Coventry, CV4 7AL, UK

<sup>b</sup> Innospec Limited, Innospec Manufacturing Park, Oil Sites Road, Ellesmere Port, Cheshire, CH65 4EY, UK

<sup>c</sup> School of Engineering and Material Science, Queen Mary University of London, Mile End Road, London, E1 4NS, UK

**Corresponding author:** R.Becer@qmul.ac.uk

**Phone:** +44 (0)20 7882 6534

**Twitter:** @remzibecer

## Characterisation of functionalised AMS monomers

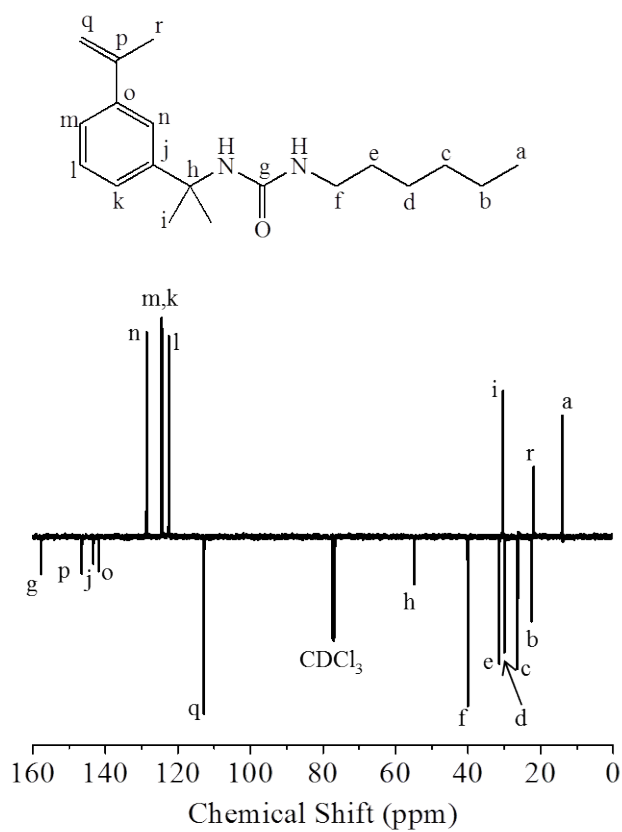

**Figure S1.** <sup>13</sup>C-NMR (CDCl<sub>3</sub>) of AMSC<sub>6</sub>

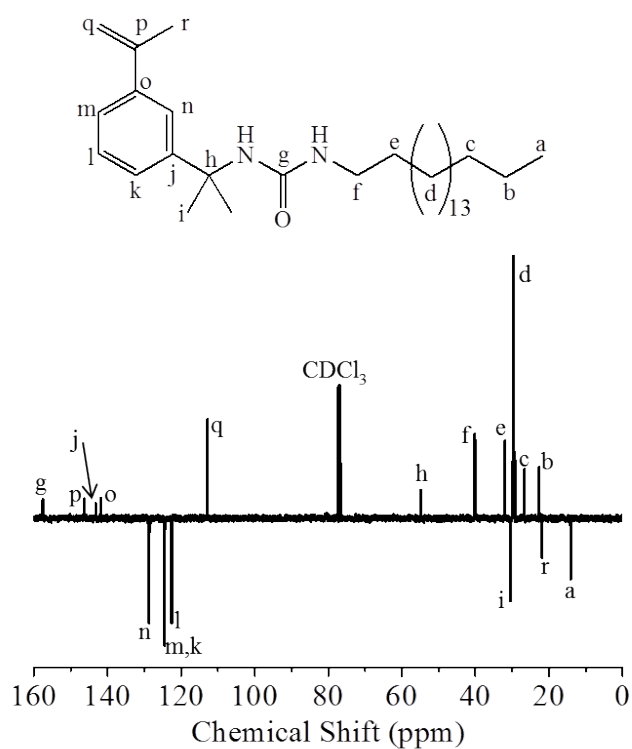

**Figure S2.** <sup>13</sup>C-NMR (CDCl<sub>3</sub>) of AMSC<sub>18</sub>

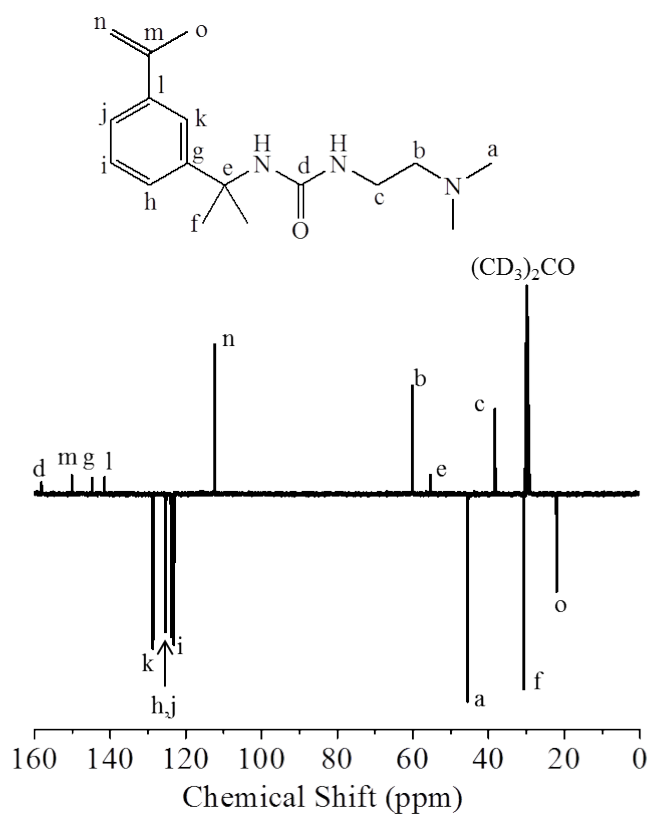

**Figure S3.**  $^{13}\text{C}$ -NMR ( $(\text{CD}_3)_2\text{CO}$ ) of AMSDMA

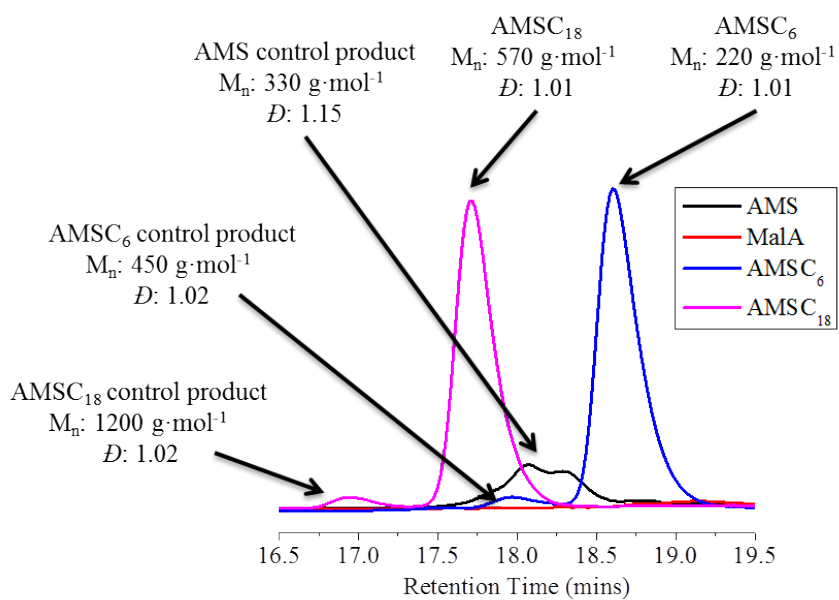

**Figure S4.** GPC chromatograms (RID) for the control homopolymerizations of AMS, AMSC<sub>6</sub>, AMSC<sub>18</sub> and MalA.
